# Supplementary material for: Porous graphene to encapsulate Na6.24Fe4.88(P2O7)4 as composite cathode materials for Na-ion batteries
Source: Royal Society of Chemistry journal article supplement (doi:10.1039/c5cc04422g), 2015-01-01
Supplement: c5cc04422g1.pdf [file c5cc04422g1.pdf]

## Electronic Supplementary information (ESI) for Poring graphene to encapsulate $\text{Na}_{6.24}\text{Fe}_{4.88}(\text{P}_2\text{O}_7)_4$ as composite cathode materials for Na-ion batteries

Yubin Niu<sup>a,b</sup>, Maowen Xu<sup>a,b,\*</sup>, Shu-Juan Bao<sup>a,b</sup> and Chang Ming Li<sup>a,b,\*</sup>

*a. Institute for Clean Energy & Advanced Materials, Faculty of Materials and Energy, Southwest University, Chongqing 400715, P.R. China.*

*b. Chongqing Key Laboratory for Advanced Materials and Technologies of Clean Energies, Chongqing 400715, P.R. China.*

E-mail: [ecmli@swu.edu.cn](mailto:ecmli@swu.edu.cn) or [xumaowen@swu.edu.cn](mailto:xumaowen@swu.edu.cn)

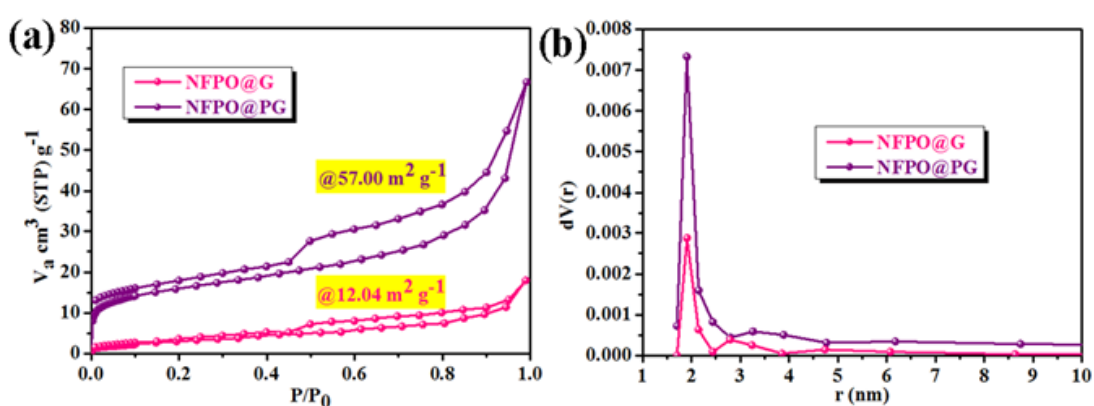

Fig. S1 Nitrogen sorption isotherm (a) and pore size distribution (b) of NFPO@G and NFPO@PG, respectively.

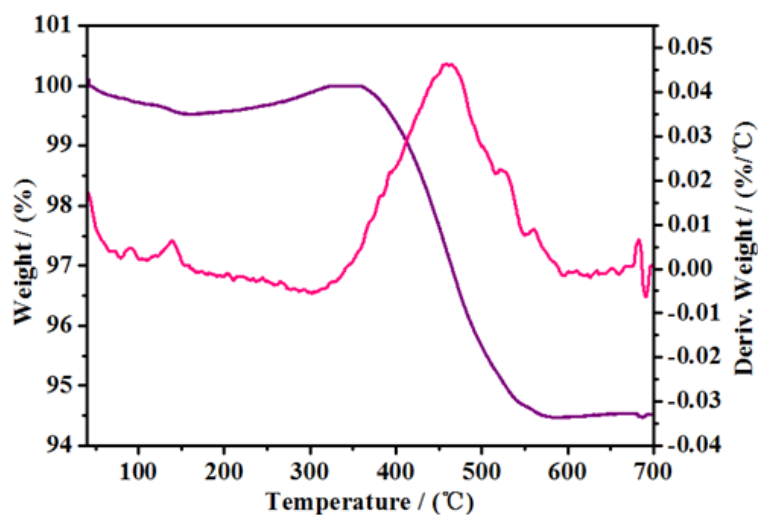

Fig. S2 TG curve of NFPO@PG.

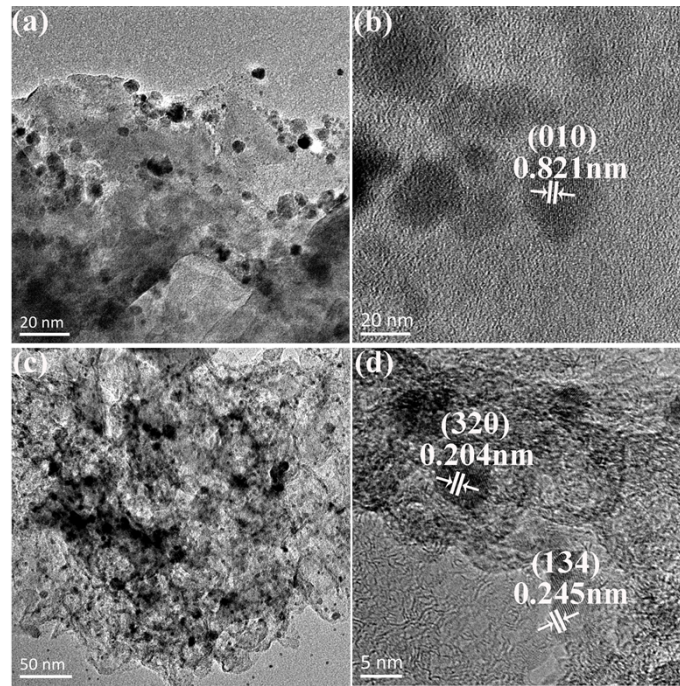

Fig. S3 TEM images of NFPO@G (a, b) and NFPO@PG (c, d). (a, c) the bright-field images, and (b, d) the HRTEM images of NFPO crystal with  $d$  spacing of 0.821 nm, 0.204 nm and 0.245 nm corresponding well with that of (010), (320) and (134) planes, respectively.
